# Supplementary material
Source: publisher figshare collection journal article supplement (https://aacr.figshare.com/articles/dataset/_/22820119)
Supplement: Supplementary file 1 [file 40570276]

**Supplementary Table 1.** Patients' characteristics

| Variables                                                       | No. (%)           |
|-----------------------------------------------------------------|-------------------|
| No. of patients                                                 | 55                |
| Age, years, median (range)                                      | 68 (47 – 88)      |
| Gender                                                          |                   |
| Male                                                            | 33 (60)           |
| Female                                                          | 22 (40)           |
| WHO classification at diagnosis                                 |                   |
| MDS-MLD                                                         | 4 (7)             |
| MDS-MLD-RS                                                      | 1 (2)             |
| EB-1                                                            | 19 (34)           |
| EB-2                                                            | 25 (46)           |
| CMML                                                            | 6 (11)            |
| Hemoglobin, g/dL, median (range)                                | 9.3 (5.2-13.8)    |
| White blood cell count, x 10 <sup>9</sup> /L, median (range)    | 2.3 (0.6-46.0)    |
| Absolute neutrophil count, x 10 <sup>9</sup> /L, median (range) | 0.97 (0.05-17.00) |
| Lymphocyte count, x 10 <sup>9</sup> /L, median (range)          | 1.08 (0.24-6.98)  |
| Platelet count, x 10 <sup>9</sup> /L, median (range)            | 67 (12-455)       |
| Marrow blast, median (range)                                    | 10 (1-18)         |
| IPSS-R cytogenetic risk                                         |                   |
| Very good/Good                                                  | 11 (20)           |
| Intermediate                                                    | 16 (29)           |
| Poor/Very poor                                                  | 28 (51)           |
| Monosomal karyotype                                             |                   |
| No                                                              | 27 (49)           |
| Yes                                                             | 28 (51)           |
| IPSS-R risk                                                     |                   |
| Very low/Low                                                    | 4 (7)             |
| Intermediated                                                   | 12 (22)           |
| High/Very high                                                  | 39 (71)           |
| Prior therapy                                                   |                   |
| None                                                            | 39 (71)           |
| HMA                                                             | 16 (29)           |

MLD, multilineage dysplasia; RS, ring sideroblasts; EB-1, excess blast-1; EB-2, excess blast-2; CMML, chronic myelomonocytic leukemia; IPSS-R, Revised International Prognostic Scoring System; HMA, hypomethylating agent;

\*All variables were assessed at the time of enrollment in all patients

**Supplementary Table 2.** The 40 most statistically significant gene expression changes between pre- and post-treatment in IMT ± HMA responders

| Gene      | Log2 fold change | P-value  | Adjusted P-value | Gene sets                                                                                                                                                                                                                                       |
|-----------|------------------|----------|------------------|-------------------------------------------------------------------------------------------------------------------------------------------------------------------------------------------------------------------------------------------------|
| CD163     | -1.57            | 0.000692 | 0.12             | Phagocytosis and Degradation                                                                                                                                                                                                                    |
| LILRB5    | -1.49            | 8.24E-05 | 0.0471           | Adaptive Immune System                                                                                                                                                                                                                          |
| CCL2      | -1.49            | 0.00145  | 0.165            | Chemokine Signaling, Cytokine Signaling, Host-pathogen Interaction, Lymphocyte Activation, NLR signaling, TNF Family Signaling                                                                                                                  |
| TNFRSF10C | -1.48            | 0.000383 | 0.101            | Apoptosis, Cytokine Signaling, Host-pathogen Interaction, Lymphocyte Activation                                                                                                                                                                 |
| LILRA3    | -1.47            | 0.000896 | 0.138            | Adaptive Immune System, Innate Immune System                                                                                                                                                                                                    |
| MSR1      | -1.46            | 2.72E-05 | 0.0233           | Phagocytosis and Degradation                                                                                                                                                                                                                    |
| CLEC7A    | -1.42            | 0.000211 | 0.0702           | Host-pathogen Interaction, Innate Immune System, Lymphocyte Activation, Phagocytosis and Degradation                                                                                                                                            |
| TGFBI     | -1.39            | 0.000496 | 0.102            | Cell Adhesion                                                                                                                                                                                                                                   |
| LILRB3    | -1.35            | 0.00153  | 0.165            | Adaptive Immune System, B cell Receptor Signaling                                                                                                                                                                                               |
| PTGS2     | -1.34            | 0.00083  | 0.138            | Cytokine Signaling, Host-pathogen Interaction, Immunometabolism, NF-kB Signaling, Oxidative Stress, TNF Family Signaling                                                                                                                        |
| MME       | -1.3             | 0.00134  | 0.165            | Innate Immune System                                                                                                                                                                                                                            |
| CSF3R     | -1.28            | 0.000479 | 0.102            | Cytokine Signaling                                                                                                                                                                                                                              |
| TLR2      | -1.28            | 0.00185  | 0.186            | Adaptive Immune System, Host-pathogen Interaction, Innate Immune System, MHC Class I Antigen Presentation, Phagocytosis and Degradation, TLR Signaling                                                                                          |
| CD209     | -1.27            | 2.92E-05 | 0.0233           | Adaptive Immune System, Host-pathogen Interaction, Innate Immune System, Lymphocyte Activation, Phagocytosis and Degradation                                                                                                                    |
| EGR1      | -1.25            | 0.000143 | 0.0636           | Cytokine Signaling, Host-pathogen Interaction, Lymphocyte Activation, Transcriptional Regulation, Type I Interferon Signaling                                                                                                                   |
| TLR4      | -1.19            | 0.00186  | 0.186            | Adaptive Immune System, Apoptosis, Host-pathogen Interaction, Innate Immune System, Lymphocyte Activation, MHC Class I Antigen Presentation, NF-kB Signaling, NLR signaling, Phagocytosis and Degradation, TLR Signaling                        |
| CCR1      | -1.18            | 0.000205 | 0.0702           | Chemokine Signaling, Cytokine Signaling                                                                                                                                                                                                         |
| FCGR2A    | -1.17            | 0.00051  | 0.102            | Host-pathogen Interaction, Innate Immune System, Phagocytosis and Degradation                                                                                                                                                                   |
| FCGRT     | -1.07            | 0.000192 | 0.0702           | Hemostasis                                                                                                                                                                                                                                      |
| TNF       | -1.06            | 0.000549 | 0.105            | Apoptosis, Cytokine Signaling, Host-pathogen Interaction, Lymphocyte Activation, NF-kB Signaling, NLR signaling, Oxidative Stress, T Cell Receptor Signaling, TGF-b Signaling, Th17 Differentiation, TLR Signaling, TNF Family Signaling        |
| CARD9     | -0.975           | 0.00149  | 0.165            | Host-pathogen Interaction, Innate Immune System, NLR signaling                                                                                                                                                                                  |
| POU2F2    | -0.931           | 0.00103  | 0.152            | Lymphocyte Activation, Transcriptional Regulation                                                                                                                                                                                               |
| SYK       | -0.746           | 0.00145  | 0.165            | Adaptive Immune System, B cell Receptor Signaling, Cytokine Signaling, Hemostasis, Host-pathogen Interaction, Innate Immune System, Lymphocyte Activation, NF-kB Signaling                                                                      |
| TNFRSF1B  | -0.695           | 0.00158  | 0.167            | Cytokine Signaling, Innate Immune System, TNF Family Signaling                                                                                                                                                                                  |
| PTPN6     | -0.566           | 0.000101 | 0.0507           | Adaptive Immune System, B cell Receptor Signaling, Cytokine Signaling, Hemostasis, Host-pathogen Interaction, Innate Immune System, Lymphocyte Activation, T Cell Receptor Signaling, Type I Interferon Signaling, Type II Interferon Signaling |
| PML       | -0.404           | 0.00134  | 0.165            | Cytokine Signaling, Host-pathogen Interaction, Oxidative Stress, Type II Interferon Signaling                                                                                                                                                   |
| CD28      | 0.923            | 0.00114  | 0.157            | Adaptive Immune System, Cell Adhesion, Host-pathogen Interaction, Lymphocyte Activation, T Cell Receptor Signaling                                                                                                                              |
| CD96      | 1.01             | 0.000316 | 0.0973           | Adaptive Immune System                                                                                                                                                                                                                          |
| CD3D      | 1.07             | 0.00111  | 0.157            | Adaptive Immune System, Host-pathogen Interaction, Lymphocyte Activation, T Cell Receptor Signaling                                                                                                                                             |
| SH2D1A    | 1.12             | 0.00139  | 0.165            | Adaptive Immune System, Host-pathogen Interaction, Lymphocyte Activation                                                                                                                                                                        |
| CD8B      | 1.16             | 0.000466 | 0.102            | Adaptive Immune System, Cell Adhesion, Lymphocyte Activation, T Cell Receptor Signaling                                                                                                                                                         |
| GATA3     | 1.23             | 0.000591 | 0.108            | Cytokine Signaling, Hemostasis, Lymphocyte Activation, Th2 Differentiation, Transcriptional Regulation                                                                                                                                          |
| GZMK      | 1.26             | 0.000403 | 0.101            | Apoptosis, Lymphocyte Activation                                                                                                                                                                                                                |
| FOXP3     | 1.31             | 0.000868 | 0.138            | Lymphocyte Activation, Transcriptional Regulation, Treg Differentiation                                                                                                                                                                         |
| IFNG      | 1.35             | 0.00145  | 0.165            | Cytokine Signaling, Host-pathogen Interaction, Lymphocyte Activation, T Cell Receptor Signaling, TGF-b Signaling, Th1 Differentiation, Type II Interferon Signaling                                                                             |
| DUSP4     | 1.48             | 0.000354 | 0.101            | Cytokine Signaling, Innate Immune System, TLR Signaling                                                                                                                                                                                         |
| KLRK1     | 1.6              | 5.90E-05 | 0.0394           | Host-pathogen Interaction, Lymphocyte Activation                                                                                                                                                                                                |
| sCTLA4    | 1.95             | 9.77E-06 | 0.0188           | Adaptive Immune System, Cell Adhesion, Lymphocyte Activation, T Cell Receptor Signaling                                                                                                                                                         |

|           |      |          |         |                                                                                         |
|-----------|------|----------|---------|-----------------------------------------------------------------------------------------|
| CTLA4_all | 2.03 | 1.41E-05 | 0.0188  | Adaptive Immune System, Cell Adhesion, Lymphocyte Activation, T Cell Receptor Signaling |
| CTLA4-TM  | 2.24 | 2.93E-07 | 0.00117 | Adaptive Immune System, Cell Adhesion, Lymphocyte Activation, T Cell Receptor Signaling |

**Supplementary Table 3.** The 40 most statistically significant gene expression changes between pre- and post-treatment in IMT ± HMA non-responders

| Gene    | Log2 fold change | P-value  | Adjusted P-value | Gene sets                                                                                                                                                                     |
|---------|------------------|----------|------------------|-------------------------------------------------------------------------------------------------------------------------------------------------------------------------------|
| CCRL1   | -3.31            | 4.26E-06 | 0.00582          | Chemokine Signaling                                                                                                                                                           |
| IL12B   | -2.57            | 2.48E-07 | 0.000991         | Cytokine Signaling, Host-pathogen Interaction, Lymphocyte Activation, Th1 Differentiation, Th17 Differentiation, TLR Signaling                                                |
| IRGM    | -2.17            | 1.28E-05 | 0.0109           | Host-pathogen Interaction                                                                                                                                                     |
| IFNA2   | -2.1             | 0.000133 | 0.024            | Cytokine Signaling, Hemostasis, Host-pathogen Interaction, Innate Immune System, Lymphocyte Activation, NLR signaling, TLR Signaling, Type I Interferon Signaling             |
| LILRA4  | -1.96            | 5.04E-05 | 0.0152           | Adaptive Immune System                                                                                                                                                        |
| EOMES   | -1.91            | 9.88E-05 | 0.0197           | Lymphocyte Activation, Transcriptional Regulation                                                                                                                             |
| CCL8    | -1.84            | 3.00E-04 | 0.0353           | Chemokine Signaling, Cytokine Signaling                                                                                                                                       |
| ICOS    | -1.82            | 1.91E-05 | 0.0109           | Cell Adhesion, Lymphocyte Activation, T Cell Receptor Signaling                                                                                                               |
| ARG2    | -1.82            | 0.000449 | 0.046            | Host-pathogen Interaction, Immunometabolism                                                                                                                                   |
| IL18R1  | -1.77            | 0.000444 | 0.046            | Cytokine Signaling, Lymphocyte Activation, TNF Family Signaling                                                                                                               |
| KLRC2   | -1.56            | 0.000143 | 0.024            | Innate Immune System, Lymphocyte Activation                                                                                                                                   |
| TNFRSF8 | -1.56            | 0.000192 | 0.0271           | Cytokine Signaling                                                                                                                                                            |
| KIR3DL2 | -1.53            | 6.48E-05 | 0.0162           | Adaptive Immune System, Lymphocyte Activation                                                                                                                                 |
| CR1     | -1.5             | 5.29E-05 | 0.0152           | Complement System, Host-pathogen Interaction, Innate Immune System                                                                                                            |
| CD274   | -1.46            | 0.00035  | 0.0388           | Adaptive Immune System, Cell Adhesion, Lymphocyte Activation                                                                                                                  |
| CRADD   | -1.33            | 5.33E-05 | 0.0152           | Apoptosis                                                                                                                                                                     |
| CCR6    | -1.33            | 0.000121 | 0.023            | Chemokine Signaling, Cytokine Signaling, Innate Immune System                                                                                                                 |
| KLRG1   | -1.33            | 0.000197 | 0.0271           | Adaptive Immune System, Lymphocyte Activation                                                                                                                                 |
| CD1A    | -1.33            | 0.000377 | 0.0407           | Adaptive Immune System                                                                                                                                                        |
| CCL5    | -1.3             | 2.95E-05 | 0.0113           | Chemokine Signaling, Cytokine Signaling, Host-pathogen Interaction, Lymphocyte Activation, NLR signaling, Oxidative Stress, TLR Signaling, TNF Family Signaling               |
| IRAK2   | -1.3             | 6.14E-05 | 0.0162           | Cytokine Signaling, Host-pathogen Interaction, Innate Immune System, NLR signaling, TLR Signaling                                                                             |
| ITGB1   | -1.22            | 2.80E-05 | 0.0113           | Adaptive Immune System, Cell Adhesion, Cytokine Signaling, Hemostasis, Host-pathogen Interaction, Lymphocyte Activation, Lymphocyte Trafficking, Phagocytosis and Degradation |
| ICOSLG  | -1.21            | 8.99E-05 | 0.0189           | Adaptive Immune System, Cell Adhesion, Lymphocyte Activation                                                                                                                  |
| TIGIT   | -1.17            | 0.000238 | 0.0297           | Cell Adhesion, Lymphocyte Activation                                                                                                                                          |
| ABCB1   | -1.15            | 0.000173 | 0.0264           | Immunometabolism                                                                                                                                                              |
| ATG12   | -1.14            | 2.97E-05 | 0.0113           | Autophagy, Innate Immune System, NLR signaling                                                                                                                                |
| IL6ST   | -0.996           | 0.000237 | 0.0297           | Cytokine Signaling, Lymphocyte Activation, Th17 Differentiation                                                                                                               |
| SLC2A1  | -0.987           | 0.000342 | 0.0388           | Host-pathogen Interaction, Immunometabolism                                                                                                                                   |
| TRAF4   | -0.971           | 7.71E-05 | 0.0171           | NF-κB Signaling, TNF Family Signaling                                                                                                                                         |
| ATG5    | -0.823           | 1.65E-05 | 0.0109           | Autophagy, Host-pathogen Interaction, Innate Immune System, Lymphocyte Activation, NLR signaling                                                                              |
| GFI1    | -0.82            | 3.12E-05 | 0.0113           | Transcriptional Regulation                                                                                                                                                    |
| CD59    | -0.76            | 0.00015  | 0.024            | Complement System, Innate Immune System, Lymphocyte Activation                                                                                                                |

|          |        |          |         |                                                                                                                                                                                                                                                                                             |
|----------|--------|----------|---------|---------------------------------------------------------------------------------------------------------------------------------------------------------------------------------------------------------------------------------------------------------------------------------------------|
| MAPK1    | -0.699 | 4.37E-06 | 0.00582 | Apoptosis, Autophagy, B cell Receptor Signaling, Chemokine Signaling, Cytokine Signaling, Hemostasis, Host-pathogen Interaction, Innate Immune System, Lymphocyte Activation, NLR signaling, T Cell Receptor Signaling, TGF- $\beta$ Signaling, TLR Signaling, TNF Family Signaling         |
| GPI      | 0.536  | 7.41E-05 | 0.0171  | Immunometabolism, Innate Immune System                                                                                                                                                                                                                                                      |
| ILF3     | 1.01   | 0.00015  | 0.024   | Transcriptional Regulation                                                                                                                                                                                                                                                                  |
| HLA-DPA1 | 1.08   | 0.000509 | 0.0495  | Adaptive Immune System, Cell Adhesion, Cytokine Signaling, Host-pathogen Interaction, Lymphocyte Activation, MHC Class II Antigen Presentation, Phagocytosis and Degradation, T Cell Receptor Signaling, Type II Interferon Signaling                                                       |
| FCGR2B   | 1.39   | 1.43E-05 | 0.0109  | Adaptive Immune System, B cell Receptor Signaling, Host-pathogen Interaction, Phagocytosis and Degradation                                                                                                                                                                                  |
| CD24     | 1.61   | 0.000179 | 0.0264  | Lymphocyte Activation                                                                                                                                                                                                                                                                       |
| NFKBIA   | 1.78   | 0.000207 | 0.0275  | Adaptive Immune System, Apoptosis, B cell Receptor Signaling, Chemokine Signaling, Cytokine Signaling, Host-pathogen Interaction, Innate Immune System, NF- $\kappa$ B Signaling, NLR signaling, T Cell Receptor Signaling, TLR Signaling, TNF Family Signaling, Transcriptional Regulation |
| S100A9   | 1.9    | 0.000264 | 0.0319  | Innate Immune System, TLR Signaling                                                                                                                                                                                                                                                         |

**Supplementary Table 4.** The 40 most statistically significant differential expression results between pre- and post-samples in the patients treated with  $\alpha$ CTLA4  $\pm$  HMA

| Gene      | Log2 fold change | P-value  | Adjusted P-value | Gene sets                                                                                                                                                                                                                                                    |
|-----------|------------------|----------|------------------|--------------------------------------------------------------------------------------------------------------------------------------------------------------------------------------------------------------------------------------------------------------|
| EDNRB     | -1.73            | 0.00222  | 0.467            | Hemostasis                                                                                                                                                                                                                                                   |
| IL1A      | -1.64            | 0.00739  | 0.8              | Cytokine Signaling, Host-pathogen Interaction                                                                                                                                                                                                                |
| CCL8      | -1.62            | 0.00233  | 0.467            | Chemokine Signaling, Cytokine Signaling                                                                                                                                                                                                                      |
| FN1       | -1.61            | 0.00713  | 0.8              | Cytokine Signaling, Hemostasis, Host-pathogen Interaction, Oxidative Stress                                                                                                                                                                                  |
| PPARG     | -1.58            | 0.000686 | 0.365            | Immunometabolism, Transcriptional Regulation                                                                                                                                                                                                                 |
| IL10      | -1.31            | 0.000644 | 0.365            | Cytokine Signaling, Host-pathogen Interaction, Lymphocyte Activation, T Cell Receptor Signaling, Treg Differentiation                                                                                                                                        |
| MSR1      | -1.28            | 0.00143  | 0.443            | Phagocytosis and Degradation                                                                                                                                                                                                                                 |
| HFE       | -1.24            | 0.00182  | 0.443            | Lymphocyte Activation                                                                                                                                                                                                                                        |
| IL1R1     | -1.23            | 0.00792  | 0.8              | Cytokine Signaling, Host-pathogen Interaction, NF-kB Signaling, Oxidative Stress, Th17 Differentiation                                                                                                                                                       |
| CD1D      | -1.14            | 0.00485  | 0.695            | Adaptive Immune System, Host-pathogen Interaction, Lymphocyte Activation                                                                                                                                                                                     |
| HAVCR2    | -1.13            | 0.00268  | 0.486            | Cytokine Signaling, Lymphocyte Activation                                                                                                                                                                                                                    |
| CD209     | -1.12            | 0.000738 | 0.365            | Adaptive Immune System, Host-pathogen Interaction, Innate Immune System, Lymphocyte Activation, Phagocytosis and Degradation                                                                                                                                 |
| BST2      | -1.01            | 0.00185  | 0.443            | Cytokine Signaling, Innate Immune System, Lymphocyte Activation, Type I Interferon Signaling                                                                                                                                                                 |
| CD4       | -0.885           | 0.00552  | 0.763            | Adaptive Immune System, Cell Adhesion, Cytokine Signaling, Innate Immune System, Lymphocyte Activation, T Cell Receptor Signaling                                                                                                                            |
| AHR       | -0.848           | 0.0042   | 0.648            | Immunometabolism, Lymphocyte Activation, Th17 Differentiation, Transcriptional Regulation                                                                                                                                                                    |
| BCL3      | -0.735           | 0.00291  | 0.486            | Lymphocyte Activation, TNF Family Signaling, Transcriptional Regulation                                                                                                                                                                                      |
| SYK       | -0.711           | 0.00188  | 0.443            | Adaptive Immune System, B cell Receptor Signaling, Cytokine Signaling, Hemostasis, Host-pathogen Interaction, Innate Immune System, Lymphocyte Activation, NF-kB Signaling                                                                                   |
| TLR1      | -0.646           | 0.00288  | 0.486            | Adaptive Immune System, Host-pathogen Interaction, Innate Immune System, MHC Class I Antigen Presentation, TLR Signaling                                                                                                                                     |
| ITGA5     | -0.636           | 0.000867 | 0.365            | Hemostasis, Host-pathogen Interaction, Phagocytosis and Degradation                                                                                                                                                                                          |
| IRF7      | -0.596           | 0.00798  | 0.8              | Cytokine Signaling, Hemostasis, Host-pathogen Interaction, Innate Immune System, NLR signaling, TLR Signaling, Transcriptional Regulation, Type I Interferon Signaling, Type II Interferon Signaling                                                         |
| MCL1      | -0.567           | 0.0072   | 0.8              | Apoptosis, Cytokine Signaling, Oxidative Stress                                                                                                                                                                                                              |
| BCL10     | -0.502           | 0.00164  | 0.443            | Adaptive Immune System, B cell Receptor Signaling, Host-pathogen Interaction, Innate Immune System, Lymphocyte Activation, NF-kB Signaling, T Cell Receptor Signaling                                                                                        |
| HLA-DRA   | -0.493           | 0.00737  | 0.8              | Adaptive Immune System, Cell Adhesion, Cytokine Signaling, Host-pathogen Interaction, Lymphocyte Activation, MHC Class II Antigen Presentation, Phagocytosis and Degradation, T Cell Receptor Signaling, Type II Interferon Signaling                        |
| CD44      | -0.429           | 0.000419 | 0.355            | Cytokine Signaling, Hemostasis, Host-pathogen Interaction, Immunometabolism, Innate Immune System, Type II Interferon Signaling                                                                                                                              |
| TNFSF8    | -0.429           | 0.00722  | 0.8              | Cytokine Signaling, Lymphocyte Activation                                                                                                                                                                                                                    |
| SMAD5     | -0.423           | 0.00679  | 0.8              | TGF- $\beta$ Signaling                                                                                                                                                                                                                                       |
| CD164     | -0.385           | 7.42E-05 | 0.149            | Phagocytosis and Degradation                                                                                                                                                                                                                                 |
| IFIH1     | -0.364           | 0.00731  | 0.8              | Host-pathogen Interaction, Innate Immune System                                                                                                                                                                                                              |
| STAT3     | -0.355           | 0.000241 | 0.322            | Chemokine Signaling, Cytokine Signaling, Host-pathogen Interaction, Th17 Differentiation, Transcriptional Regulation, Treg Differentiation                                                                                                                   |
| HLA-B     | -0.344           | 0.00468  | 0.695            | Adaptive Immune System, Cell Adhesion, Cytokine Signaling, Host-pathogen Interaction, Innate Immune System, Lymphocyte Activation, MHC Class I Antigen Presentation, Phagocytosis and Degradation, Type I Interferon Signaling, Type II Interferon Signaling |
| TRAF2     | 0.376            | 0.00705  | 0.8              | Apoptosis, Cytokine Signaling, Host-pathogen Interaction, Innate Immune System, Lymphocyte Activation, NF-kB Signaling, NLR signaling, Oxidative Stress, TNF Family Signaling                                                                                |
| MBP       | 0.779            | 0.00184  | 0.443            | Lymphocyte Trafficking                                                                                                                                                                                                                                       |
| CD96      | 0.815            | 0.00184  | 0.443            | Adaptive Immune System                                                                                                                                                                                                                                       |
| IL18RAP   | 0.897            | 0.00233  | 0.467            | Cytokine Signaling, Oxidative Stress                                                                                                                                                                                                                         |
| IL32      | 1.05             | 0.00779  | 0.8              | Cytokine Signaling                                                                                                                                                                                                                                           |
| CTLA4_all | 1.19             | 0.00248  | 0.473            | Adaptive Immune System, Cell Adhesion, Lymphocyte Activation, T Cell Receptor Signaling                                                                                                                                                                      |
| IL20      | 1.27             | 0.00345  | 0.554            | Cytokine Signaling                                                                                                                                                                                                                                           |
| sCTLA4    | 1.33             | 0.000911 | 0.365            | Adaptive Immune System, Cell Adhesion, Lymphocyte Activation, T Cell Receptor Signaling                                                                                                                                                                      |
| CTLA4-TM  | 1.48             | 7.55E-07 | 0.00303          | Adaptive Immune System, Cell Adhesion, Lymphocyte Activation, T Cell Receptor Signaling                                                                                                                                                                      |
| KLRK1     | 1.76             | 0.000443 | 0.355            | Host-pathogen Interaction, Lymphocyte Activation                                                                                                                                                                                                             |

**Supplementary Table 5.** The 40 most statistically significant differential expression results between pre- and post-samples in the patients treated with  $\alpha$ PD1  $\pm$  HMA

| Gene      | Log2 fold change | P-value  | Adjusted P-value | Gene sets                                                                                                                                                                                                                |
|-----------|------------------|----------|------------------|--------------------------------------------------------------------------------------------------------------------------------------------------------------------------------------------------------------------------|
| CD86      | -3.92            | 0.00153  | 0.279            | Adaptive Immune System, Cell Adhesion, Cytokine Signaling, Lymphocyte Activation, TLR Signaling                                                                                                                          |
| LILRA6    | -3.81            | 0.00148  | 0.279            | Adaptive Immune System, MHC Class I Antigen Presentation                                                                                                                                                                 |
| TLR7      | -3.66            | 0.00212  | 0.279            | Host-pathogen Interaction, Innate Immune System, TLR Signaling                                                                                                                                                           |
| LTF       | -3.56            | 0.000793 | 0.279            | Innate Immune System                                                                                                                                                                                                     |
| CLEC7A    | -3.46            | 0.000373 | 0.279            | Host-pathogen Interaction, Innate Immune System, Lymphocyte Activation, Phagocytosis and Degradation                                                                                                                     |
| CD14      | -3.46            | 0.00269  | 0.279            | Adaptive Immune System, Apoptosis, Host-pathogen Interaction, Innate Immune System, MHC Class I Antigen Presentation, NF-kB Signaling, Phagocytosis and Degradation, TLR Signaling                                       |
| TLR1      | -3.18            | 0.00229  | 0.279            | Adaptive Immune System, Host-pathogen Interaction, Innate Immune System, MHC Class I Antigen Presentation, TLR Signaling                                                                                                 |
| LILRA1    | -3.09            | 0.00244  | 0.279            | Adaptive Immune System                                                                                                                                                                                                   |
| TLR4      | -3.08            | 0.00223  | 0.279            | Adaptive Immune System, Apoptosis, Host-pathogen Interaction, Innate Immune System, Lymphocyte Activation, MHC Class I Antigen Presentation, NF-kB Signaling, NLR signaling, Phagocytosis and Degradation, TLR Signaling |
| TNFRSF10C | -3.03            | 0.000508 | 0.279            | Apoptosis, Cytokine Signaling, Host-pathogen Interaction, Lymphocyte Activation                                                                                                                                          |
| TGFBI     | -2.91            | 0.000643 | 0.279            | Cell Adhesion                                                                                                                                                                                                            |
| TYK2      | -2.74            | 0.00113  | 0.279            | Cytokine Signaling, Host-pathogen Interaction, NLR signaling, Th1 Differentiation, Th17 Differentiation, Treg Differentiation, Type I Interferon Signaling                                                               |
| TNFRSF13B | -2.67            | 0.00107  | 0.279            | Cytokine Signaling, Lymphocyte Activation                                                                                                                                                                                |
| FCER1A    | -2.55            | 0.00172  | 0.279            | Innate Immune System                                                                                                                                                                                                     |
| CCR1      | -2.55            | 0.00288  | 0.279            | Chemokine Signaling, Cytokine Signaling                                                                                                                                                                                  |
| CEBPB     | -2.51            | 0.00224  | 0.279            | Host-pathogen Interaction, Lymphocyte Activation, TNF Family Signaling, Transcriptional Regulation                                                                                                                       |
| TNFRSF8   | -2.51            | 0.00249  | 0.279            | Cytokine Signaling                                                                                                                                                                                                       |
| LILRA4    | -2.48            | 0.00161  | 0.279            | Adaptive Immune System                                                                                                                                                                                                   |
| LILRB3    | -2.46            | 0.00209  | 0.279            | Adaptive Immune System, B cell Receptor Signaling                                                                                                                                                                        |
| TFRC      | -2.31            | 0.00256  | 0.279            | Phagocytosis and Degradation                                                                                                                                                                                             |
| LTBR      | -2.31            | 0.00264  | 0.279            | Cytokine Signaling, Host-pathogen Interaction, NF-kB Signaling                                                                                                                                                           |
| TLR2      | -2.24            | 0.00245  | 0.279            | Adaptive Immune System, Host-pathogen Interaction, Innate Immune System, MHC Class I Antigen Presentation, Phagocytosis and Degradation, TLR Signaling                                                                   |
| IL18      | -2.23            | 0.00203  | 0.279            | Cytokine Signaling, Host-pathogen Interaction, Lymphocyte Activation, NLR signaling                                                                                                                                      |
| LILRA3    | -2.18            | 0.000864 | 0.279            | Adaptive Immune System, Innate Immune System                                                                                                                                                                             |
| ARG2      | -2.07            | 0.000494 | 0.279            | Host-pathogen Interaction, Immunometabolism                                                                                                                                                                              |
| CAMP      | -2.06            | 0.00276  | 0.279            | Host-pathogen Interaction, Innate Immune System, NLR signaling                                                                                                                                                           |
| SRC       | -2.04            | 0.00049  | 0.279            | Chemokine Signaling, Host-pathogen Interaction, Lymphocyte Activation, Oxidative Stress                                                                                                                                  |
| TLR9      | -1.99            | 0.000909 | 0.279            | Host-pathogen Interaction, Innate Immune System, TLR Signaling                                                                                                                                                           |
| FCGRT     | -1.52            | 0.00277  | 0.279            | Hemostasis                                                                                                                                                                                                               |
| LILRA5    | -1.52            | 0.00285  | 0.279            | Adaptive Immune System                                                                                                                                                                                                   |
| TNFRSF13C | -1.42            | 0.00182  | 0.279            | Cytokine Signaling, Host-pathogen Interaction, Lymphocyte Activation, NF-kB Signaling                                                                                                                                    |
| TAL1      | -1.36            | 0.000592 | 0.279            | Transcriptional Regulation                                                                                                                                                                                               |
| MAP4K2    | -1.19            | 0.00219  | 0.279            | TNF Family Signaling                                                                                                                                                                                                     |
| IL1RAP    | -0.925           | 0.00125  | 0.279            | Cytokine Signaling, Th17 Differentiation                                                                                                                                                                                 |

|          |        |          |       |                                                                                                                                                                                                                                       |
|----------|--------|----------|-------|---------------------------------------------------------------------------------------------------------------------------------------------------------------------------------------------------------------------------------------|
| IRF8     | -0.733 | 0.00084  | 0.279 | Cytokine Signaling, Host-pathogen Interaction, Transcriptional Regulation, Type I Interferon Signaling, Type II Interferon Signaling                                                                                                  |
| HLA-DPB1 | -0.651 | 0.000183 | 0.279 | Adaptive Immune System, Cell Adhesion, Cytokine Signaling, Host-pathogen Interaction, Lymphocyte Activation, MHC Class II Antigen Presentation, Phagocytosis and Degradation, T Cell Receptor Signaling, Type II Interferon Signaling |
| STAT5A   | -0.581 | 0.00261  | 0.279 | Cytokine Signaling, Host-pathogen Interaction, Th2 Differentiation, Transcriptional Regulation                                                                                                                                        |
| CD96     | 0.858  | 0.00259  | 0.279 | Adaptive Immune System                                                                                                                                                                                                                |
| CXCR4    | 1.29   | 0.000681 | 0.279 | Chemokine Signaling, Cytokine Signaling, Lymphocyte Trafficking                                                                                                                                                                       |
| DUSP4    | 2.24   | 0.00162  | 0.279 | Cytokine Signaling, Innate Immune System, TLR Signaling                                                                                                                                                                               |



**Supplementary Table 6.** The 40 most statistically significant differential expression results between pre- and post-samples in the patients treated with  $\alpha$ CTLA4/ $\alpha$ PD1  $\pm$  HMA

| Gene     | Log2 fold change | P-value  | Adjusted P-value | Gene sets                                                                                                                                                                                                                                                                    |
|----------|------------------|----------|------------------|------------------------------------------------------------------------------------------------------------------------------------------------------------------------------------------------------------------------------------------------------------------------------|
| CCRL1    | -3.14            | 3.26E-05 | 0.028            | Chemokine Signaling                                                                                                                                                                                                                                                          |
| C6       | -2.79            | 3.16E-05 | 0.028            | Complement System, Innate Immune System                                                                                                                                                                                                                                      |
| EDNRB    | -2.39            | 0.000949 | 0.206            | Hemostasis                                                                                                                                                                                                                                                                   |
| CDH5     | -2.15            | 0.000741 | 0.194            | Cell Adhesion, Lymphocyte Trafficking                                                                                                                                                                                                                                        |
| IL6      | -1.92            | 2.33E-05 | 0.028            | Cytokine Signaling, Host-pathogen Interaction, Lymphocyte Activation, NLR signaling, Oxidative Stress, Th17 Differentiation, Th2 Differentiation, TLR Signaling, TNF Family Signaling                                                                                        |
| IL12B    | -1.9             | 0.00289  | 0.382            | Cytokine Signaling, Host-pathogen Interaction, Lymphocyte Activation, Th1 Differentiation, Th17 Differentiation, TLR Signaling                                                                                                                                               |
| IFNA1/13 | -1.86            | 0.000939 | 0.206            | Cytokine Signaling, Host-pathogen Interaction, Lymphocyte Activation, NLR signaling, TLR Signaling, Type I Interferon Signaling                                                                                                                                              |
| MBL2     | -1.82            | 0.00279  | 0.382            | Complement System, Host-pathogen Interaction, Innate Immune System, Oxidative Stress, Phagocytosis and Degradation                                                                                                                                                           |
| DEFB103A | -1.73            | 0.000371 | 0.106            | Innate Immune System                                                                                                                                                                                                                                                         |
| CCL8     | -1.72            | 0.000777 | 0.194            | Chemokine Signaling, Cytokine Signaling                                                                                                                                                                                                                                      |
| RAG2     | -1.71            | 0.00125  | 0.227            | Cytokine Signaling, Lymphocyte Activation                                                                                                                                                                                                                                    |
| CD209    | -1.63            | 0.00205  | 0.356            | Adaptive Immune System, Host-pathogen Interaction, Innate Immune System, Lymphocyte Activation, Phagocytosis and Degradation                                                                                                                                                 |
| MME      | -1.62            | 0.00217  | 0.362            | Innate Immune System                                                                                                                                                                                                                                                         |
| IFNA2    | -1.61            | 0.00409  | 0.419            | Cytokine Signaling, Hemostasis, Host-pathogen Interaction, Innate Immune System, Lymphocyte Activation, NLR signaling, TLR Signaling, Type I Interferon Signaling                                                                                                            |
| IRGM     | -1.6             | 0.000275 | 0.0848           | Host-pathogen Interaction                                                                                                                                                                                                                                                    |
| ITLN1    | -1.58            | 0.00379  | 0.408            | Innate Immune System                                                                                                                                                                                                                                                         |
| SLC2A1   | -1.55            | 0.000117 | 0.0609           | Host-pathogen Interaction, Immunometabolism                                                                                                                                                                                                                                  |
| IL28A    | -1.54            | 0.00229  | 0.367            | Cytokine Signaling, Lymphocyte Activation                                                                                                                                                                                                                                    |
| CCRL2    | -1.38            | 0.00306  | 0.382            | Chemokine Signaling                                                                                                                                                                                                                                                          |
| TNFSF15  | -1.31            | 0.00372  | 0.408            | Cytokine Signaling                                                                                                                                                                                                                                                           |
| TNF      | -1.3             | 0.000194 | 0.0647           | Apoptosis, Cytokine Signaling, Host-pathogen Interaction, Lymphocyte Activation, NF-kB Signaling, NLR signaling, Oxidative Stress, T Cell Receptor Signaling, TGF-b Signaling, Th17 Differentiation, TLR Signaling, TNF Family Signaling                                     |
| TNFRSF8  | -1.29            | 0.00368  | 0.408            | Cytokine Signaling                                                                                                                                                                                                                                                           |
| LILRA4   | -1.28            | 0.00304  | 0.382            | Adaptive Immune System                                                                                                                                                                                                                                                       |
| CCL11    | -1.27            | 0.00281  | 0.382            | Chemokine Signaling, Cytokine Signaling                                                                                                                                                                                                                                      |
| IL1B     | -1.2             | 0.00388  | 0.408            | Cytokine Signaling, Host-pathogen Interaction, Innate Immune System, Lymphocyte Activation, NF-kB Signaling, NLR signaling, Oxidative Stress, Th17 Differentiation, TLR Signaling, TNF Family Signaling                                                                      |
| CR1      | -1.18            | 0.000174 | 0.0631           | Complement System, Host-pathogen Interaction, Innate Immune System                                                                                                                                                                                                           |
| CD36     | -1.03            | 0.0036   | 0.408            | Adaptive Immune System, Cytokine Signaling, Hemostasis, Host-pathogen Interaction, Immunometabolism, Innate Immune System, MHC Class I Antigen Presentation, Oxidative Stress, Phagocytosis and Degradation, TLR Signaling                                                   |
| IL6ST    | -0.893           | 2.00E-05 | 0.028            | Cytokine Signaling, Lymphocyte Activation, Th17 Differentiation                                                                                                                                                                                                              |
| TRAF4    | -0.862           | 0.000135 | 0.0609           | NF-kB Signaling, TNF Family Signaling                                                                                                                                                                                                                                        |
| MAPK1    | -0.636           | 0.000152 | 0.0609           | Apoptosis, Autophagy, B cell Receptor Signaling, Chemokine Signaling, Cytokine Signaling, Hemostasis, Host-pathogen Interaction, Innate Immune System, Lymphocyte Activation, NLR signaling, T Cell Receptor Signaling, TGF-b Signaling, TLR Signaling, TNF Family Signaling |
| CTSC     | 0.383            | 0.00348  | 0.408            | Adaptive Immune System, Apoptosis, Innate Immune System, MHC Class II Antigen Presentation, Phagocytosis and Degradation                                                                                                                                                     |
| HLA-DPB1 | 0.65             | 0.000977 | 0.206            | Adaptive Immune System, Cell Adhesion, Cytokine Signaling, Host-pathogen Interaction, Lymphocyte Activation, MHC Class II Antigen Presentation, Phagocytosis and Degradation, T Cell Receptor Signaling, Type II Interferon Signaling                                        |

|          |       |          |        |                                                                                                               |
|----------|-------|----------|--------|---------------------------------------------------------------------------------------------------------------|
| IRAK3    | 0.987 | 0.00594  | 0.582  | Cytokine Signaling, Innate Immune System, TLR Signaling                                                       |
| CD45RB   | 1.06  | 0.00299  | 0.382  | Adaptive Immune System, Cell Adhesion, Innate Immune System, Lymphocyte Activation, T Cell Receptor Signaling |
| MUC1     | 1.14  | 0.00113  | 0.222  | Cytokine Signaling, Innate Immune System                                                                      |
| IFI35    | 1.26  | 0.000142 | 0.0609 | Cytokine Signaling, Type I Interferon Signaling                                                               |
| FCGR2B   | 1.3   | 0.000105 | 0.0609 | Adaptive Immune System, B cell Receptor Signaling, Host-pathogen Interaction, Phagocytosis and Degradation    |
| BTLA     | 1.4   | 0.00275  | 0.382  | Adaptive Immune System, Lymphocyte Activation                                                                 |
| sCTLA4   | 2.02  | 0.00116  | 0.222  | Adaptive Immune System, Cell Adhesion, Lymphocyte Activation, T Cell Receptor Signaling                       |
| CTLA4-TM | 3.21  | 3.50E-05 | 0.028  | Adaptive Immune System, Cell Adhesion, Lymphocyte Activation, T Cell Receptor Signaling                       |

**Supplementary Table 7.** The 40 most statistically significant differential expression results between pre- and post-samples in the patients treated with HMA alone

| Gene      | Log2 fold change | P-value  | Adjusted P-value | Gene sets                                                                                                                                                                                                                              |
|-----------|------------------|----------|------------------|----------------------------------------------------------------------------------------------------------------------------------------------------------------------------------------------------------------------------------------|
| S100A8    | -3.03            | 2.28E-05 | 0.00368          | Innate Immune System, TLR Signaling                                                                                                                                                                                                    |
| IL32      | -2.91            | 3.09E-05 | 0.00411          | Cytokine Signaling                                                                                                                                                                                                                     |
| CD74      | -2.82            | 1.24E-05 | 0.00253          | Adaptive Immune System, Hemostasis, Host-pathogen Interaction, Lymphocyte Activation, MHC Class II Antigen Presentation                                                                                                                |
| CD45RA    | -2.33            | 7.45E-06 | 0.00192          | Adaptive Immune System, Cell Adhesion, Innate Immune System, Lymphocyte Activation, T Cell Receptor Signaling                                                                                                                          |
| PECAM1    | -2.26            | 4.69E-05 | 0.00482          | Cell Adhesion, Hemostasis, Host-pathogen Interaction, Innate Immune System, Lymphocyte Trafficking                                                                                                                                     |
| GPR183    | -2.25            | 2.80E-05 | 0.00388          | Lymphocyte Activation                                                                                                                                                                                                                  |
| MYD88     | -2.12            | 1.66E-05 | 0.00307          | Adaptive Immune System, Cytokine Signaling, Host-pathogen Interaction, Innate Immune System, Lymphocyte Activation, MHC Class I Antigen Presentation, NF-kB Signaling, NLR signaling, TLR Signaling                                    |
| IL2RB     | -1.96            | 4.76E-05 | 0.00482          | Cytokine Signaling, Hemostasis, Host-pathogen Interaction, Lymphocyte Activation, Th2 Differentiation                                                                                                                                  |
| CD164     | -1.16            | 4.75E-05 | 0.00482          | Phagocytosis and Degradation                                                                                                                                                                                                           |
| TAGAP     | 1.62             | 2.46E-06 | 0.00106          | NF-kB Signaling                                                                                                                                                                                                                        |
| GNLY      | 2.28             | 2.51E-05 | 0.00385          | Innate Immune System                                                                                                                                                                                                                   |
| LCP2      | 2.48             | 4.86E-05 | 0.00482          | Adaptive Immune System, Hemostasis, Innate Immune System, Lymphocyte Activation, T Cell Receptor Signaling                                                                                                                             |
| CD79A     | 2.6              | 4.85E-06 | 0.00134          | Adaptive Immune System, B cell Receptor Signaling, Lymphocyte Activation                                                                                                                                                               |
| TNFRSF14  | 2.61             | 3.51E-05 | 0.00413          | Adaptive Immune System, Cytokine Signaling, Host-pathogen Interaction, Lymphocyte Activation                                                                                                                                           |
| GZMB      | 2.7              | 2.58E-05 | 0.00385          | Apoptosis, Lymphocyte Activation                                                                                                                                                                                                       |
| IRF8      | 2.74             | 3.39E-05 | 0.00411          | Cytokine Signaling, Host-pathogen Interaction, Transcriptional Regulation, Type I Interferon Signaling, Type II Interferon Signaling                                                                                                   |
| IL10RA    | 2.83             | 4.07E-05 | 0.00451          | Cytokine Signaling, Host-pathogen Interaction, Treg Differentiation                                                                                                                                                                    |
| ADA       | 2.97             | 3.45E-06 | 0.00112          | Immunometabolism, Lymphocyte Activation, Oxidative Stress                                                                                                                                                                              |
| TNFRSF13C | 3.1              | 3.74E-07 | 0.000255         | Cytokine Signaling, Host-pathogen Interaction, Lymphocyte Activation, NF-kB Signaling                                                                                                                                                  |
| CD48      | 3.11             | 3.80E-05 | 0.00433          | Hemostasis, Lymphocyte Activation                                                                                                                                                                                                      |
| RUNX1     | 3.12             | 8.80E-06 | 0.00201          | Transcriptional Regulation                                                                                                                                                                                                             |
| JAK1      | 3.15             | 3.20E-05 | 0.00411          | Cytokine Signaling, Hemostasis, Host-pathogen Interaction, NLR signaling, Th1 Differentiation, Th17 Differentiation, Treg Differentiation, Type I Interferon Signaling, Type II Interferon Signaling                                   |
| JAK3      | 3.19             | 2.72E-05 | 0.00388          | Chemokine Signaling, Cytokine Signaling, Hemostasis, Host-pathogen Interaction, Lymphocyte Activation, Th17 Differentiation, Th2 Differentiation                                                                                       |
| IL8       | 3.2              | 3.33E-05 | 0.00411          | Chemokine Signaling, Cytokine Signaling, Host-pathogen Interaction, NF-kB Signaling, NLR signaling, TLR Signaling                                                                                                                      |
| CTNNB1    | 3.28             | 3.28E-06 | 0.00112          | Host-pathogen Interaction, Innate Immune System, Lymphocyte Activation, Lymphocyte Trafficking                                                                                                                                         |
| KLRK1     | 3.5              | 4.97E-05 | 0.00482          | Host-pathogen Interaction, Lymphocyte Activation                                                                                                                                                                                       |
| IFI16     | 3.56             | 1.31E-05 | 0.00253          | Innate Immune System, NLR signaling                                                                                                                                                                                                    |
| HLA-A     | 3.57             | 9.28E-08 | 0.000144         | Adaptive Immune System, Cell Adhesion, Cytokine Signaling, Host-pathogen Interaction, Lymphocyte Activation, MHC Class I Antigen Presentation, Phagocytosis and Degradation, Type I Interferon Signaling, Type II Interferon Signaling |
| PTPN2     | 3.78             | 1.27E-05 | 0.00253          | Cytokine Signaling, Lymphocyte Activation                                                                                                                                                                                              |
| CD46      | 3.82             | 8.32E-06 | 0.00201          | Complement System, Host-pathogen Interaction, Innate Immune System, Lymphocyte Activation                                                                                                                                              |
| BTLA      | 3.91             | 3.87E-06 | 0.00115          | Adaptive Immune System, Lymphocyte Activation                                                                                                                                                                                          |
| KLRD1     | 4.03             | 3.21E-06 | 0.00112          | Adaptive Immune System, Innate Immune System, Lymphocyte Activation                                                                                                                                                                    |
| LGALS3    | 4.06             | 1.85E-05 | 0.00326          | Innate Immune System, Lymphocyte Activation                                                                                                                                                                                            |

|          |      |          |          |                                                                                                                                                                                                                                                                                    |
|----------|------|----------|----------|------------------------------------------------------------------------------------------------------------------------------------------------------------------------------------------------------------------------------------------------------------------------------------|
| NFKBIA   | 4.54 | 6.66E-08 | 0.000144 | Adaptive Immune System, Apoptosis, B cell Receptor Signaling, Chemokine Signaling, Cytokine Signaling, Host-pathogen Interaction, Innate Immune System, NF-kB Signaling, NLR signaling, T Cell Receptor Signaling, TLR Signaling, TNF Family Signaling, Transcriptional Regulation |
| CASP8    | 4.92 | 8.07E-07 | 0.000447 | Apoptosis, Host-pathogen Interaction, Innate Immune System, Lymphocyte Activation, NLR signaling, TLR Signaling, TNF Family Signaling                                                                                                                                              |
| NOTCH2   | 5.07 | 1.83E-06 | 0.000884 | Host-pathogen Interaction, Lymphocyte Activation, Th2 Differentiation                                                                                                                                                                                                              |
| CD97     | 5.82 | 3.95E-07 | 0.000255 | Innate Immune System                                                                                                                                                                                                                                                               |
| HLA-DPA1 | 5.99 | 1.51E-07 | 0.000147 | Adaptive Immune System, Cell Adhesion, Cytokine Signaling, Host-pathogen Interaction, Lymphocyte Activation, MHC Class II Antigen Presentation, Phagocytosis and Degradation, T Cell Receptor Signaling, Type II Interferon Signaling                                              |
| CD58     | 6.4  | 2.07E-05 | 0.0035   | Cell Adhesion, Hemostasis, Host-pathogen Interaction, Innate Immune System                                                                                                                                                                                                         |
| STAT1    | 6.82 | 1.12E-07 | 0.000144 | Chemokine Signaling, Cytokine Signaling, Host-pathogen Interaction, NLR signaling, Th1 Differentiation, TLR Signaling, Transcriptional Regulation, Type I Interferon Signaling, Type II Interferon Signaling                                                                       |
